# Supplementary material
Source: MDPI journal article supplement (https://www.mdpi.com/2225-1154/8/2/22)

## Supplementary Materials

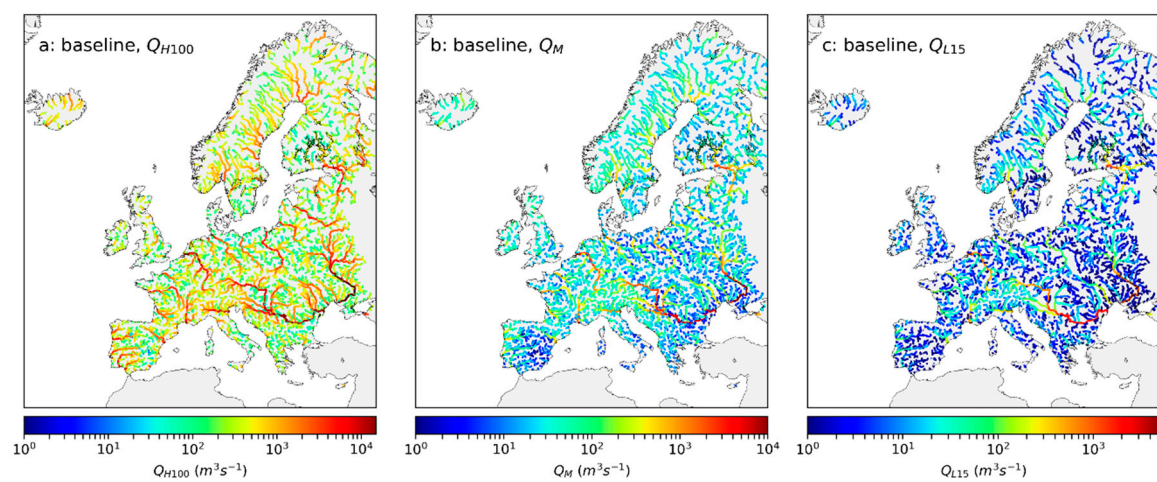

**Figure S1.** Baseline maps.

Supplement: s1 [file s1]
